# Supplementary material
Source: Research Square preprint supplement (doi:10.21203/rs.3.rs-8990251/v1)
Supplement: Supplementary file 1 [file 3bd1e4e96dfa4ca906c50506.pdf]

# Survey: One Health and Inclusivity

*"Exploring*

*the connections among human, animal, plant and environmental health is a key component of the One Health approach and together with issues around diversity-inclusivity and disparity-equity should be incorporated into health professions education programs for all levels and fields of health professional learners"*

This survey aims to explore:

a)

Curriculum content related to ONE HEALTH and INCLUSIVITY in our undergraduate programs

b)

Strategies employed for ONE HEALTH and INCLUSIVITY teaching and learning

c)

Whether there is a need for curriculum development in the domain of One health and Inclusivity

**Target audience:**

Academic staff at all levels in all undergraduate Health Profession programs

Your participation in this survey voluntary, but will be highly appreciated

**Use of data collected:**

The data collected will assist in determining whether there is a need for inter-professional curriculum development in the domain of ONE HEALTH and INCLUSIVITY in the SADC region,

and if so, it will assist us to motivate and write a Collaborative Grant funding proposal, approaching the European Union and institutional partners.

\* Indicates required question

---

1. Email \*

---

2. Consent: \*

I have read the information on the proposed study and was given adequate time to rethink the issue. The aim and objectives of the study are sufficiently clear to me. I have not been pressured to participate in any way.

I understand that participation in this Study is completely voluntary and that I may withdraw from it at any time and without supplying reasons.

I know this Study has been approved by the Sefako Makgatho Health Sciences University Research Ethics Committee (SMUREC). I am fully aware that the results of this Study will be used for scientific purposes and may be published. I agree to this, provided my privacy is guaranteed.

**Ethics clearance:** SMUREC/M/250/2024:IR

I hereby give consent to participate in this Study

*Check all that apply.*

- I agree, in this case please PROCEED to the next question
- I dont agree- in this case do NOT proceed

3. **Section A: Individual Demographic details**

A1. Title, Name and surname (optional):

---

4. A2. Alternative E-mail address (optional):

---

## 5. A3. Level of seniority (Select all relevant from the list below) \*

*Check all that apply.*

- 1. Dean or Director of Faculty or School
- 2. HOD of a department or Head of Unit
- 3. Professor (full, associate, adjunct etc.) actively engaged in teaching
- 4. Senior Lecturer
- 5. Lecturer
- 6. Junior Lecturer
- Other: \_\_\_\_\_

## 6. A4. Country and Institution (select all relevant from the list below) \*

*Check all that apply.*

- 1. Utrecht University and University Medical Center Utrecht
- 2. Botswana University of Agriculture and Natural Resources (BUAN)
- 3. Botswana, University of Botswana
- 4. Botswana, Institute of Health Sciences (all affiliated)
- 5. Spain, Open University of Catalonia.
- 6. Namibia, University of Namibia
- 7. Namibia, Welwitchia University
- 9. South Africa, Sefako Makgatho Health Sciences University, Gauteng Province
- 10. South Africa, Walter Sisulu University, Eastern Cape Province
- Other: \_\_\_\_\_

7. **Section B: Qualification field / Discipline**

\*

**B1: Undergraduate qualifications such as Bachelors, Diploma or Higher Certificate** of HPE programs at your institution / the institution where you teach Undergraduate students (Select all relevant from the list below)

*Check all that apply.*

- 1. Agriculture and Natural Resources, Undergraduate
- 2. Audiology, Undergraduate
- 3. Bio-medical Engineering, Undergraduate
- 4. Complementary and Alternative Medicine / African Traditional Medicine, Undergraduate
- 5. Dentistry, Undergraduate
- 6. Dental therapy, Undergraduate
- 7. Emergency Care/Medicine, Undergraduate
- 8. Environmental Health, Undergraduate
- 9. Human Dietetics/Nutrition, Undergraduate
- 10. Medicine and Surgery, Undergraduate
- 11. Medical Associates, Undergraduate
- 12. Nursing, Undergraduate
- 13. Occupational Health and Safety, Undergraduate
- 14. Occupational Therapy, Undergraduate
- 15. Optometry, Undergraduate
- 16. Oral Hygiene, Undergraduate
- 17. Pharmacy, Undergraduate
- 18. Physiotherapy, Undergraduate
- 19. Podiatry, Undergraduate
- 20. Psychology, Undergraduate
- 21. Public Health or Community Development, Undergraduate
- 22. Radiography, Undergraduate
- 23. Social Work, Undergraduate
- 24. Speech Language Therapy /Pathology, Undergraduate
- 25. Sports Medicine, Undergraduate
- 26. Veterinary Sciences, Undergraduate
- 27. Special e.g. orientating foreign trained students/graduates into local context
- 28. None of the above
- Other: \_\_\_\_\_

8. **B2: Academic year level** in which any ONE HEALTH and INCLUSIVITY related topics appears (Select all relevant from the list below) \*

*Check all that apply.*

- 1. Academic year level 1
- 2. Academic year level 2
- 3. Academic year level 3
- 4. Academic year level 4
- 5. Academic year level 5
- 6. Academic year level 6
- 7. Level 7 and higher
- None of the above
- Other: \_\_\_\_\_

9. B3: Specific **Discipline courses/modules/subjects** in which any ONE HEALTH and INCLUSIVITY topics appears) (Select all relevant from the list below) \*

*Check all that apply.*

- 1. Agriculture and food production
- 2. Anaesthesiology and/or Anaesthesia and/or Pain medicine and related
- 3. Anatomy (human or animal)
- 4. Anatomical Pathology (human or animal)
- 5. Animal disease, animal infectious disease, animal injury etc.
- 6. Biology, Life sciences, Medical Biology
- 7. Community Health, Community Medicine, Community Nursing, Community Dentistry etc.
- 8. Chemistry and/or Chemical Pathology and related
- 9. Dermatology, skin infectious, tumours, lesions, injury etc.
- 10. Education in health and/or Nursing Education and/or Medical Education and related
- 11. Emergency Care and/or Emergency Medicine and trauma related
- 12. Family medicine and Primary Health Care
- 13. Food Hygiene or Food Safety or Safe Food Production, handling and preparation
- 14. Forensic Medicine and/or Forensic Pathology
- 15. General Surgery and/or other Surgical specialties and subspecialties
- 16. Geriatrics
- 17. Haematological Pathology and/or Clinical Haematology
- 18. Humanities e.g. Anthropology, Sociology, Social Work, Criminology etc.
- 19. Internal Medicine
- 20. Infectious Disease
- 21. Microbiology (human or animal)
- 22. Natural Resources management e.g. water
- 23. Neurology and /or Neurosurgery and related
- 24. Nephrology
- 25. Nursing, General nursing
- 26. Obstetrics and/or Pregnancy and labour related (human and animal)
- 27. Oncology
- 28. Ophthalmology and/or Optometry and EYE disease related
- 29. Orthopaedic Medicine and/or Orthopaedic Surgery
- 30. Otorhinolaryngology and/or Ear, nose, throat and related
- 31. Paediatrics and Child Health
- 32. Parasitology
- 33. Pharmacology, and/or Pharmacy (human and animal), Medicine & Drug related
- 34. Physics, Bio-physics, Medical Physics and related
- 35. Physiology (human or animal)

- 36. Psychology, Psychiatry and/or other mental health disciplines
- 37. Public Health or Public Health Management
- 38. Pulmonology, lung or airway disease and related injury
- 39. Radiology and/or Radiography and/or Nuclear Medicine or related
- 40. Virology (human or animal)
- 41. Wildlife management
- 42. Electives / Selectives e.g. Clinical or Practical
- 43. Research and/or scholarship publication related
- 44. Integrated in IPECP or in Humanities or in a "core" life skills module
- 45. None of the above
- Other: \_\_\_\_\_

10. **Section C: TOPICS/THEMES and SKILLS**

\*

C1: Topics/themes **ALREADY currently in your curriculum** as explicit for One Health and Inclusivity (Select all relevant from the list below)

*Check all that apply.*

- 1. One Health Broader awareness, Systems thinking, awareness of the bigger picture
- 2. Impact from Climate Change
- 3. Green energy, sustainable energy, alternative energies
- 4. Food security, mass agriculture and pre- and post production food safety and hygiene
- 5. Concepts of Global health, Global burden of disease
- 6. Disease outbreaks, epidemics, pandemics and healthcare response to it
- 7. Bio-surveillance, country specific or cross border / regional studies regarding outbreaks of disease
- 8. Disasters and healthcare response to it (floods, droughts, bushfires, earthquake, tsunami etc.)
- 9. War / times of conflict and refugee health and wellness
- 10. Epidemiologic problems that involve human, animal, plant and environment components
- 11. Growing interface between humans and animals, - interaction, animal-assisted therapies
- 12. Zoonotic diseases and emerging zoonotic diseases,
- 13. Impact of environmental health on human and animal health
- 14. Prevention to improve human, animal, plant and environmental health at individual level
- 15. Prevention to improve human, animal, plant and environmental health at community level
- 16. Prevention to improve human, animal, plant and environmental health at society level
- 17. Impact of biodiversity loss and ecosystem collapse on health (human, animal, plant)
- 18. Population health, care and welfare
- 19. Organisation of health services
- 20. Community-environment diagnosis, prevention, and reporting of common society problems
- 21. Socio-economic or cultural barriers to health and healthcare and ways to mitigate it
- 22. Diversity and inclusivity (race, gender, religion, age, sexual orientation, nationality etc.)
- 23. Disparity and equity (equal access to resources and services, non-discrimination)
- 24. Human civil rights and/or animal rights and ethics

25. Multi-disciplinary integrative approach to ONE HEALTH (human, animal, plant) concerns
26. Inter-professional education and collaborative practice between health professionals
27. Trans-sectorial teamwork and collaboration (education, health, safety, agriculture etc.)
28. Cultural humility (self-critique, bias and privilege, open-mindedness, support, respect)
29. Policies, legal requirements and regulations related to One Health and Inclusivity
30. None of the above
- Other: \_\_\_\_\_

11. C2: Topics/themes **NOT** in your curriculum, but you **WISH it was there** as explicit \*  
to One Health and Inclusivity (Select all relevant from the list below)

*Check all that apply.*

- 1. One Health Broader awareness, Systems thinking, awareness of the bigger picture
- 2. Impact from Climate Change
- 3. Green energy, sustainable energy, alternative energies
- 4. Food security, mass agriculture and pre- and post production food safety and hygiene
- 5. Concepts of Global health, Global burden of disease
- 6. Disease outbreaks, epidemics, pandemics and healthcare response to it
- 7. Bio-surveillance, country specific or cross border / regional studies regarding outbreaks of disease
- 8. Disasters and healthcare response to it (floods, droughts, bushfires, earthquake, tsunami etc.)
- 9. War / times of conflict and refugee health and wellness
- 10. Epidemiologic problems that involve human, animal, plant and environment components
- 11. Growing interface between humans and animals, - interaction, animal-assisted therapies
- 12. Zoonotic diseases and emerging zoonotic diseases,
- 13. Impact of environmental health on human and animal health
- 14. Prevention to improve human, animal, plant and environmental health at individual level
- 15. Prevention to improve human, animal, plant and environmental health at community level
- 16. Prevention to improve human, animal, plant and environmental health at society level
- 17. Impact of biodiversity loss and ecosystem collapse on health (human, animal, plant)
- 18. Population health, care and welfare
- 19. Organisation of health services
- 20. Community-environment diagnosis, prevention, and reporting of common society problems
- 21. Socio-economic or cultural barriers to health and healthcare and ways to mitigate it
- 22. Diversity and inclusivity (race, gender, religion, age, sexual orientation, nationality etc.)
- 23. Disparity and equity (equal access to resources and services, non-discrimination)
- 24. Human civil rights and/or animal rights and ethics
- 25. Multi-disciplinary integrative approach to ONE HEALTH (human, animal, plant) concerns

26. Inter-professional education and collaborative practice between health professionals
27. Trans-sectorial teamwork and collaboration (education, health, safety, agriculture etc.)
28. Cultural humility (self-critique, bias and privilege, open-mindedness, support, respect)
29. Policies, legal requirements and regulations related to One Health and Inclusivity
30. None of the above
- Other: \_\_\_\_\_

12. **C3. Skills and attitudes** your curriculum **ALREADY apply** to One Health and Inclusivity: (Select all relevant from the list below) \*

*Check all that apply.*

1. Advocacy and/or lobbying
2. Bio-surveillance, Evidence-based practice, research, scientific methods, scholarship
3. Critical judgment, Clinical reasoning, Critical thinking, Problem-solving, Decision-making
4. Professional Identity formation (Values, Professionalism)
5. Financial and/or Practice Management
6. Managing inter-professional and/or transdisciplinary teams and human resources
7. Managing infrastructure, equipment and/or other physical resources
8. Records management, recording, documenting and reporting
9. Community-based project management
10. None of the Above
- Other: \_\_\_\_\_

13. C4. Skills and attitudes **NOT** your curriculum but you **WISH** it could be applied to One Health and Inclusivity: (Select all relevant from the list below) \*

*Check all that apply.*

- 1. Advocacy and/or lobbying
- 2. Bio-surveillance, Evidence-based practice, research, scientific methods, scholarship
- 3. Critical judgment, Clinical reasoning, Critical thinking, Problem-solving, Decision-making
- 4. Professional Identity formation (Values, Professionalism)
- 5. Financial and/or Practice Management
- 6. Managing inter-professional and/or transdisciplinary teams and human resources
- 7. Managing infrastructure, equipment and/or other physical resources
- 8. Records management, recording, documenting and reporting
- 9. Community-based project management
- 10. None of the above
- Other: \_\_\_\_\_

14. **Section D: TEACHING AND LEARNING STRATEGIES** \*

D1: Teaching and Learning Strategies you **currently use** for any of the above ONE HEALTH and Inclusivity topics (Select all relevant from the list below)

*Check all that apply.*

- 1. Big group Virtual teaching or online ONLY
- 2. Big group Face-to-face, physical ONLY
- 3. Big group, BLENDED, both virtual/online and face to face
- 4. Small group Virtual and online ONLY
- 5. Small group Face-to-face ONLY
- 6. Small group BLENDED< both virtual/online and face to face
- 7. Case Scenarios and/or Case discussions
- 8. Simulation / Simulated practicals
- 9. Use of technology driven tools and equipment such as Robotics, 3-D printing, high fidelity mannequins etc.
- 10. Inter-professional education and/or collaborative practice - professions together
- 11. Community ACTION projects – active engagement with community members
- 12. NONE of the above
- Other: \_\_\_\_\_

15. **Section D: TEACHING AND LEARNING STRATEGIES**

\*

D2: Teaching and Learning Strategies **NOT USED** but you **WISH** it could be used\_for any of the above ONE HEALTH and Inclusivity topics (Select all relevant from the list below)

*Check all that apply.*

- 1. Big group Virtual teaching or online ONLY
- 2. Big group Face-to-face, physical ONLY
- 3. Big group, BLENDED, both virtual/online and face to face
- 4. Small group Virtual and online ONLY
- 5. Small group Face-to-face ONLY
- 6. Small group BLENDED< both virtual/online and face to face
- 7. Case Scenarios and/or Case discussions
- 8. Simulation / Simulated practicals
- 9. Use of technology driven tools and equipment such as robots, 3-D printing, high fidelity mannequins etc.
- 10. Inter-professional education and/or collaborative practice - professions together
- 11. Community ACTION projects – active engagement with community members
- 12. NONE of the above
- Other: \_\_\_\_\_

16. Please indicate if you wish to be part of a curriculum development process related \*  
to One Health and Inclusivity **and** provide your contact details if so. Alternatively  
send an e-mail to your institutional contact person:

@ SMU: Ms G Botha e:mail: [gerda.botha@smu.ac.za](mailto:gerda.botha@smu.ac.za)

@ WSU: Prof Ernesto Blanco-Blanco [eblanco-blanco@wsu.ac.za](mailto:eblanco-blanco@wsu.ac.za) & Mzukisi  
Kolosa [mkolosa@wsu.ac.za](mailto:mkolosa@wsu.ac.za)

@ UNAM: Prof F Christians [fchristians@unam.na](mailto:fchristians@unam.na) , Dr A Du  
Plessis [duplessisa@unam.na](mailto:duplessisa@unam.na)

@ Welwitchia: Prof S lipinge [iipinges@welwitchia.com.na](mailto:iipinges@welwitchia.com.na) , Prof M Hedimbi  
[hedimbim@welwitchia.com.na](mailto:hedimbim@welwitchia.com.na)

@ UB: Prof V Setlhare E-mail: [setlharev@ub.ac.bw](mailto:setlharev@ub.ac.bw) Japhter Masunge  
[masungej@ub.ac.bw](mailto:masungej@ub.ac.bw) Masego Kebaetse; [kebaetsem@ub.ac.bw](mailto:kebaetsem@ub.ac.bw)

@ IHS: Dr Jane Scotch, [jynmk1981@gmail.com](mailto:jynmk1981@gmail.com) ; Barulaganye Sebata  
[samebs78@gmail.com](mailto:samebs78@gmail.com),

@ BUAN: Dr A Abdallah [aabdallah@buan.ac.bw](mailto:aabdallah@buan.ac.bw) ; Prof DM Pfukenyi  
[dpfukenyi@buan.ac.bw](mailto:dpfukenyi@buan.ac.bw) Dr N Mokhondo / Bagwasi [nmbagwasi@buan.ac.bw](mailto:nmbagwasi@buan.ac.bw)

---

---

---

---

---

17. Please indicate if you have any further comments and/or questions and/or \*  
concerns- ensure we have your contact details in order to respond to you

---

---

---

---

---

This content is neither created nor endorsed by Google.

# Google Forms
